# Supplementary material
Source: PubMed Central journal article supplement (PMC4959199)
Supplement: AEM.00795-16_zam999117259so1.pdf [file AEM.00795-16_zam999117259so1.pdf]

**Table S1. Number of cases of zoonotic enteropathogens found in children by age group**

| <b>Age</b>   | <b># children</b> | <b>STEC</b> | <b>aEPEC</b> | <b><i>C. jejuni</i></b> | <b><i>C. coli</i></b> | <b><i>C. hyointestinalis</i></b> | <b><i>Giardia lamblia</i></b> | <b><i>Cryptosporidium parvum</i></b> | <b>Total pathogens</b> | <b>% by age</b> | <b>% Total pathogens</b> |
|--------------|-------------------|-------------|--------------|-------------------------|-----------------------|----------------------------------|-------------------------------|--------------------------------------|------------------------|-----------------|--------------------------|
| 3-12 months  | 11                | 0           | 1            | 0                       | 1                     | 0                                | 1                             | 0                                    | 3                      | 27.3            | 6.4                      |
| 1-3 years    | 31                | 0           | 5            | 7                       | 2                     | 0                                | 12                            | 1                                    | 27                     | 87.1            | 57.4                     |
| 3-5 years    | 18                | 1           | 5            | 0                       | 0                     | 1                                | 7                             | 1                                    | 15                     | 83.3            | 31.9                     |
| 6 years      | 4                 | 0           | 0            | 0                       | 0                     | 0                                | 2                             | 0                                    | 2                      | 50.0            | 4.3                      |
| <b>Total</b> | <b>64</b>         | <b>1</b>    | <b>11</b>    | <b>7</b>                | <b>3</b>              | <b>1</b>                         | <b>22</b>                     | <b>2</b>                             | <b>47</b>              | <b>73.4*</b>    | <b>100.0</b>             |

\*There were 9 children with coinfections. The real proportion of children infected was 59.4%.

**Table S2. Sequence type (ST) and ST complex of *C. jejuni***

| HH # | Specie | ST         | Allelic Profile |             |             |             |            |            |             | ST Complex |                |
|------|--------|------------|-----------------|-------------|-------------|-------------|------------|------------|-------------|------------|----------------|
|      |        |            | <i>aspA</i>     | <i>glnA</i> | <i>gltA</i> | <i>glyA</i> | <i>pgm</i> | <i>tkl</i> | <i>uncA</i> |            |                |
| 1    | 04     | Child      | 137             | 4           | 7           | 10          | 4          | 42         | 7           | 1          | ST-45 complex  |
| 2    | 14     | Rabbit     | 137             | 4           | 7           | 10          | 4          | 42         | 7           | 1          | ST-45 complex  |
| 3    | 19     | Child      | 1233            | 7           | 17          | 5           | 10         | 10         | 177         | 6          | ST-353 complex |
| 4    | 27     | Chicken    | 1233            | 7           | 17          | 5           | 10         | 10         | 177         | 6          | ST-353 complex |
| 5    | 29     | Guinea pig | 1233            | 7           | 17          | 5           | 10         | 10         | 177         | 6          | ST-353 complex |
| 6    | 29     | Chicken    | 1233            | 7           | 17          | 5           | 10         | 10         | 177         | 6          | ST-353 complex |
| 7    | 22     | Chicken    | 3515            | 7           | 17          | 2           | 2          | 10         | 3           | 6          | ST-353 complex |
| 8    | 22     | Quail      | <b>7643</b>     | 7           | 17          | 5           | 2          | 10         | 3           | 54         | ST-353 complex |
| 9    | 22     | Dog        | <b>7643</b>     | 7           | 17          | 5           | 2          | 10         | 3           | 54         | ST-353 complex |
| 10   | 33     | Child      | 3515            | 7           | 17          | 2           | 2          | 10         | 3           | 6          | ST-353 complex |
| 11   | 34     | Chicken    | 354             | 8           | 10          | 2           | 2          | 11         | 12          | 6          | ST-354 complex |
| 12   | 31     | Quail      | <b>7662</b>     | <b>390</b>  | 2           | 2           | 2          | 11         | 5           | 6          | ST-354 complex |
| 13   | 56     | Chicken    | <b>7662</b>     | <b>390</b>  | 2           | 2           | 2          | 11         | 5           | 6          | ST-354 complex |
| 14   | 18     | Chicken    | <b>7669</b>     | 8           | 10          | 95          | 2          | 11         | 12          | 6          | ST-354 complex |
| 15   | 36     | Rabbit     | 464             | 24          | 2           | 2           | 2          | 10         | 3           | 1          | ST-464 complex |
| 16   | 36     | Chicken    | 464             | 24          | 2           | 2           | 2          | 10         | 3           | 1          | ST-464 complex |
| 17   | 21     | Chicken    | 607             | 8           | 2           | 5           | 53         | 11         | 3           | 1          | ST-607 complex |
| 18   | 34     | Dog        | 607             | 8           | 2           | 5           | 53         | 11         | 3           | 1          | ST-607 complex |
| 19   | 51     | Chicken    | 607             | 8           | 2           | 5           | 53         | 11         | 3           | 1          | ST-607 complex |
| 20   | 54     | Dog        | 607             | 8           | 2           | 5           | 53         | 11         | 3           | 1          | ST-607 complex |
| 21   | 13     | Pig        | 1212            | 8           | 2           | 5           | 53         | 11         | 3           | 105        | ST-607 complex |
| 22   | 42     | Chicken    | 1212            | 8           | 2           | 5           | 53         | 11         | 3           | 105        | ST-607 complex |
| 23   | 62     | Cattle     | 1212            | 8           | 2           | 5           | 53         | 11         | 3           | 105        | ST-607 complex |
| 24   | 07     | Dog        | <b>7671</b>     | 8           | 113         | 5           | 121        | 11         | 25          | 6          | ****           |
| 25   | 62     | Child      | <b>7671</b>     | 8           | 113         | 5           | 121        | 11         | 25          | 6          | ****           |
| 26   | 06     | Dog        | <b>7672</b>     | 2           | 114         | 5           | 298        | 13         | 61          | <b>460</b> | ****           |
| 27   | 56     | Cat        | <b>7672</b>     | 2           | 114         | 5           | 298        | 13         | 61          | <b>460</b> | ****           |
| 28   | 07     | Guinea pig | <b>7759</b>     | 4           | 7           | <b>455</b>  | 62         | <b>731</b> | 25          | 104        | ****           |
| 29   | 32     | Guinea pig | <b>7759</b>     | 4           | 7           | <b>455</b>  | 62         | <b>731</b> | 25          | 104        | ****           |
| 30   | 05     | Guinea pig | <b>7759</b>     | 4           | 7           | <b>455</b>  | 62         | <b>731</b> | 25          | 104        | ****           |
| 31   | 45     | Guinea pig | <b>7759</b>     | 4           | 7           | <b>455</b>  | 62         | <b>731</b> | 25          | 104        | ****           |
| 32   | 56     | Guinea pig | <b>7759</b>     | 4           | 7           | <b>455</b>  | 62         | <b>731</b> | 25          | 104        | ****           |
| 33   | 57     | Guinea pig | <b>7759</b>     | 4           | 7           | <b>455</b>  | 62         | <b>731</b> | 25          | 104        | ****           |
| 34   | 36     | Guinea pig | <b>7760</b>     | 4           | 7           | <b>455</b>  | 62         | <b>733</b> | 25          | 104        | ****           |
| 35   | 01     | Guinea pig | <b>7775</b>     | <b>394</b>  | <b>538</b>  | <b>454</b>  | <b>601</b> | <b>729</b> | <b>582</b>  | <b>462</b> | ****           |
| 36   | 63     | Guinea pig | <b>7775</b>     | <b>394</b>  | <b>538</b>  | <b>454</b>  | <b>601</b> | <b>729</b> | <b>582</b>  | <b>462</b> | ****           |
| 37   | 22     | Guinea pig | <b>7775</b>     | <b>394</b>  | <b>538</b>  | <b>454</b>  | <b>601</b> | <b>729</b> | <b>582</b>  | <b>462</b> | ****           |
| 38   | 62     | Guinea pig | <b>7775</b>     | <b>394</b>  | <b>538</b>  | <b>454</b>  | <b>601</b> | <b>729</b> | <b>582</b>  | <b>462</b> | ****           |
| 39   | 11     | Guinea pig | <b>7777</b>     | <b>394</b>  | <b>537</b>  | <b>454</b>  | <b>601</b> | <b>729</b> | <b>582</b>  | <b>463</b> | ****           |
| 40   | 18     | Guinea pig | <b>7778</b>     | <b>394</b>  | <b>538</b>  | <b>454</b>  | <b>601</b> | <b>729</b> | <b>582</b>  | <b>464</b> | ****           |
| 41   | 40     | Guinea pig | <b>7779</b>     | <b>393</b>  | <b>536</b>  | <b>454</b>  | 62         | <b>734</b> | <b>583</b>  | 104        | ****           |
| 42   | 58     | Guinea pig | <b>7779</b>     | <b>393</b>  | <b>536</b>  | <b>454</b>  | 62         | <b>734</b> | <b>583</b>  | 104        | ****           |
| 43   | 41     | Guinea pig | <b>7780</b>     | <b>393</b>  | <b>536</b>  | <b>454</b>  | 62         | 13         | 25          | 104        | ****           |
| 44   | 59     | Guinea pig | <b>7780</b>     | <b>393</b>  | <b>536</b>  | <b>454</b>  | 62         | 13         | 25          | 104        | ****           |
| 45   | 02     | Guinea pig | <b>7781</b>     | <b>394</b>  | <b>538</b>  | <b>454</b>  | <b>601</b> | <b>730</b> | <b>582</b>  | <b>462</b> | ****           |
| 46   | 27     | Guinea pig | <b>7781</b>     | <b>394</b>  | <b>538</b>  | <b>454</b>  | <b>601</b> | <b>730</b> | <b>582</b>  | <b>462</b> | ****           |
| 47   | 30     | Guinea pig | <b>7781</b>     | <b>394</b>  | <b>538</b>  | <b>454</b>  | <b>601</b> | <b>730</b> | <b>582</b>  | <b>462</b> | ****           |
| 48   | 58     | Guinea pig | <b>7789</b>     | <b>394</b>  | <b>538</b>  | <b>454</b>  | <b>601</b> | <b>729</b> | <b>582</b>  | <b>463</b> | ****           |

The STs and alleles marked in bold correspond to new one.

**Table S3. Sequence type (ST) and ST complex of atypical enteropathogenic *E. coli***

| HH #      | Specie     | ST   | Allelic profile |             |             |            |            |             |             |                | ST complex |
|-----------|------------|------|-----------------|-------------|-------------|------------|------------|-------------|-------------|----------------|------------|
|           |            |      | <i>adk</i>      | <i>fumC</i> | <i>gyrB</i> | <i>icd</i> | <i>mdh</i> | <i>purA</i> | <i>recA</i> |                |            |
| <b>1</b>  | 36 Pig     | 20   | 6               | 4           | 3           | 18         | 7          | 7           | 6           | ST-20 complex  |            |
| <b>2</b>  | 47 Child   | 20   | 6               | 4           | 3           | 18         | 7          | 7           | 6           | ST-20 complex  |            |
| <b>3</b>  | 27 Child   | 29   | 6               | 4           | 12          | 16         | 9          | 7           | 7           | ST-29 complex  |            |
| <b>4</b>  | 32 Pig     | 137  | 19              | 23          | 51          | 24         | 21         | 2           | 16          | ST-32 complex  |            |
| <b>5</b>  | 55 Child   | 137  | 19              | 23          | 51          | 24         | 21         | 2           | 16          | ST-32 complex  |            |
| <b>6</b>  | 34 Chicken | 328  | 9               | 23          | 81          | 18         | 11         | 8           | 6           | ST-278 complex |            |
| <b>7</b>  | 29 Child   | 590  | 6               | 4           | 12          | 10         | 24         | 18          | 7           | ST-590 complex |            |
| <b>8</b>  | 18 Child   | 517  | 109             | 65          | 5           | 1          | 9          | 13          | 14          | ****           |            |
| <b>9</b>  | 29 Sheep   | 327  | 6               | 4           | 4           | 85         | 43         | 12          | 7           | ****           |            |
| <b>10</b> | 39 Child   | 4550 | 6               | 4           | 12          | 476        | 9          | 7           | 7           | ****           |            |
| <b>11</b> | 58 Dog     | 517  | 109             | 65          | 5           | 1          | 9          | 13          | 14          | ****           |            |
| <b>12</b> | 62 Duck    | 327  | 6               | 4           | 4           | 85         | 43         | 12          | 7           | ****           |            |
| <b>13</b> | 62 Dog     | 3075 | 10              | 23          | 109         | 8          | 270        | 8           | 2           | ****           |            |
| <b>14</b> | 63 Chicken | 4550 | 6               | 4           | 12          | 476        | 9          | 7           | 7           | ****           |            |

**Table S4. Coinfections with zoonotic enteropathogens found in fecal samples.**

| N°    | # HH | Specie     | Zoonotic enteric pathogens                                       | <i>Campylobacter</i> spp., aEPEC | <i>Campylobacter</i> spp., <i>Giardia</i> aEPEC, <i>Giardia</i> | aEPEC, <i>C. coli</i> | <i>C. jejuni</i> , <i>Giardia</i> aEPEC, <i>C. jejuni</i> | <i>Salmonella</i> , <i>Giardia</i> | STEC, <i>C. jejuni</i> | <i>C. coli</i> , <i>Giardia</i> | <i>C. jejuni</i> , <i>Campylobacter</i> sp. | <i>C. coli</i> , <i>Salmonella</i> | <i>C. jejuni</i> , <i>C. coli</i> | <i>C. jejuni</i> , <i>Cryptosporidium</i> , <i>Giardia</i> | <i>Campylobacter</i> sp., <i>Giardia</i> | <i>C. coli</i> , <i>Yersinia</i> | aEPEC, <i>C. jejuni</i> , <i>Giardia</i> | aEPEC, <i>Campylobacter</i> sp. | aEPEC, STEC |
|-------|------|------------|------------------------------------------------------------------|----------------------------------|-----------------------------------------------------------------|-----------------------|-----------------------------------------------------------|------------------------------------|------------------------|---------------------------------|---------------------------------------------|------------------------------------|-----------------------------------|------------------------------------------------------------|------------------------------------------|----------------------------------|------------------------------------------|---------------------------------|-------------|
| 1     | 56   | Cat        | <i>C. jejuni</i> , <i>C. coli</i>                                |                                  |                                                                 |                       |                                                           |                                    |                        |                                 |                                             |                                    |                                   |                                                            |                                          |                                  |                                          |                                 |             |
| 2     | 22   | Cattle     | aEPEC, STEC                                                      |                                  |                                                                 |                       |                                                           |                                    |                        |                                 |                                             |                                    |                                   |                                                            |                                          |                                  |                                          |                                 |             |
| 3     | 62   | Cattle     | STEC, <i>C. jejuni</i>                                           |                                  |                                                                 |                       |                                                           |                                    |                        |                                 |                                             |                                    |                                   |                                                            |                                          |                                  |                                          |                                 |             |
| 4     | 29   | Chicken    | STEC, <i>C. jejuni</i>                                           |                                  |                                                                 |                       |                                                           |                                    |                        |                                 |                                             |                                    |                                   |                                                            |                                          |                                  |                                          |                                 |             |
| 5     | 34   | Chicken    | aEPEC, <i>C. jejuni</i>                                          |                                  |                                                                 |                       |                                                           |                                    |                        |                                 |                                             |                                    |                                   |                                                            |                                          |                                  |                                          |                                 |             |
| 6     | 63   | Chicken    | aEPEC, <i>C. coli</i>                                            |                                  |                                                                 |                       |                                                           |                                    |                        |                                 |                                             |                                    |                                   |                                                            |                                          |                                  |                                          |                                 |             |
| 7     | 18   | Child      | aEPEC, <i>C. jejuni</i> , <i>Giardia</i>                         |                                  |                                                                 |                       |                                                           |                                    |                        |                                 |                                             |                                    |                                   |                                                            |                                          |                                  |                                          |                                 |             |
| 8     | 19   | Child      | <i>C. jejuni</i> , <i>Giardia</i>                                |                                  |                                                                 |                       |                                                           |                                    |                        |                                 |                                             |                                    |                                   |                                                            |                                          |                                  |                                          |                                 |             |
| 9     | 26   | Child      | aEPEC, <i>Giardia</i>                                            |                                  |                                                                 |                       |                                                           |                                    |                        |                                 |                                             |                                    |                                   |                                                            |                                          |                                  |                                          |                                 |             |
| 10    | 39   | Child      | aEPEC, <i>Giardia</i>                                            |                                  |                                                                 |                       |                                                           |                                    |                        |                                 |                                             |                                    |                                   |                                                            |                                          |                                  |                                          |                                 |             |
| 11    | 50   | Child      | <i>C. jejuni</i> , <i>Cryptosporidium</i> , <i>Giardia</i>       |                                  |                                                                 |                       |                                                           |                                    |                        |                                 |                                             |                                    |                                   |                                                            |                                          |                                  |                                          |                                 |             |
| 12    | 55   | Child      | aEPEC, <i>Giardia</i>                                            |                                  |                                                                 |                       |                                                           |                                    |                        |                                 |                                             |                                    |                                   |                                                            |                                          |                                  |                                          |                                 |             |
| 13    | 29   | Child      | aEPEC, <i>Giardia</i>                                            |                                  |                                                                 |                       |                                                           |                                    |                        |                                 |                                             |                                    |                                   |                                                            |                                          |                                  |                                          |                                 |             |
| 14    | 62   | Child      | aEPEC, <i>C. coli</i>                                            |                                  |                                                                 |                       |                                                           |                                    |                        |                                 |                                             |                                    |                                   |                                                            |                                          |                                  |                                          |                                 |             |
| 15    | 64   | Child      | aEPEC, <i>Giardia</i>                                            |                                  |                                                                 |                       |                                                           |                                    |                        |                                 |                                             |                                    |                                   |                                                            |                                          |                                  |                                          |                                 |             |
| 16    | 07   | Dog        | <i>C. jejuni</i> , <i>Giardia</i>                                |                                  |                                                                 |                       |                                                           |                                    |                        |                                 |                                             |                                    |                                   |                                                            |                                          |                                  |                                          |                                 |             |
| 17    | 17   | Dog        | <i>Salmonella</i> , <i>Giardia</i>                               |                                  |                                                                 |                       |                                                           |                                    |                        |                                 |                                             |                                    |                                   |                                                            |                                          |                                  |                                          |                                 |             |
| 18    | 34   | Dog        | <i>C. jejuni</i> , <i>Salmonella</i> , <i>Giardia</i>            |                                  |                                                                 |                       |                                                           |                                    |                        |                                 |                                             |                                    |                                   |                                                            |                                          |                                  |                                          |                                 |             |
| 19    | 42   | Dog        | <i>C. coli</i> , <i>Salmonella</i>                               |                                  |                                                                 |                       |                                                           |                                    |                        |                                 |                                             |                                    |                                   |                                                            |                                          |                                  |                                          |                                 |             |
| 20    | 59   | Dog        | <i>Salmonella</i> , <i>Giardia</i>                               |                                  |                                                                 |                       |                                                           |                                    |                        |                                 |                                             |                                    |                                   |                                                            |                                          |                                  |                                          |                                 |             |
| 21    | 04   | Duck       | <i>C. jejuni</i> , <i>Campylobacter canadensis</i>               |                                  |                                                                 |                       |                                                           |                                    |                        |                                 |                                             |                                    |                                   |                                                            |                                          |                                  |                                          |                                 |             |
| 22    | 18   | Guinea pig | aEPEC, <i>C. jejuni</i>                                          |                                  |                                                                 |                       |                                                           |                                    |                        |                                 |                                             |                                    |                                   |                                                            |                                          |                                  |                                          |                                 |             |
| 23    | 48   | Guinea pig | <i>C. coli</i> , <i>Giardia</i>                                  |                                  |                                                                 |                       |                                                           |                                    |                        |                                 |                                             |                                    |                                   |                                                            |                                          |                                  |                                          |                                 |             |
| 24    | 56   | Guinea pig | aEPEC, <i>C. jejuni</i>                                          |                                  |                                                                 |                       |                                                           |                                    |                        |                                 |                                             |                                    |                                   |                                                            |                                          |                                  |                                          |                                 |             |
| 25    | 64   | Guinea pig | <i>C. jejuni</i> , STEC                                          |                                  |                                                                 |                       |                                                           |                                    |                        |                                 |                                             |                                    |                                   |                                                            |                                          |                                  |                                          |                                 |             |
| 26    | 07   | Pig        | <i>C. jejuni</i> , <i>C. hyointestinalis</i>                     |                                  |                                                                 |                       |                                                           |                                    |                        |                                 |                                             |                                    |                                   |                                                            |                                          |                                  |                                          |                                 |             |
| 27    | 07   | Pig        | <i>C. jejuni</i> , <i>C. coli</i>                                |                                  |                                                                 |                       |                                                           |                                    |                        |                                 |                                             |                                    |                                   |                                                            |                                          |                                  |                                          |                                 |             |
| 28    | 21   | Pig        | aEPEC, <i>C. coli</i>                                            |                                  |                                                                 |                       |                                                           |                                    |                        |                                 |                                             |                                    |                                   |                                                            |                                          |                                  |                                          |                                 |             |
| 29    | 32   | Pig        | aEPEC, <i>C. coli</i>                                            |                                  |                                                                 |                       |                                                           |                                    |                        |                                 |                                             |                                    |                                   |                                                            |                                          |                                  |                                          |                                 |             |
| 30    | 36   | Pig        | aEPEC, <i>C. hyointestinalis</i>                                 |                                  |                                                                 |                       |                                                           |                                    |                        |                                 |                                             |                                    |                                   |                                                            |                                          |                                  |                                          |                                 |             |
| 31    | 41   | Pig        | <i>Campylobacter lamienae</i> , <i>Giardia</i>                   |                                  |                                                                 |                       |                                                           |                                    |                        |                                 |                                             |                                    |                                   |                                                            |                                          |                                  |                                          |                                 |             |
| 32    | 45   | Pig        | <i>C. coli</i> , <i>Yersinia enterocolitica</i>                  |                                  |                                                                 |                       |                                                           |                                    |                        |                                 |                                             |                                    |                                   |                                                            |                                          |                                  |                                          |                                 |             |
| 33    | 29   | Sheep      | <i>C. coli</i> , <i>Giardia</i> , <i>Cryptosporidium</i> , aEPEC |                                  |                                                                 |                       |                                                           |                                    |                        |                                 |                                             |                                    |                                   |                                                            |                                          |                                  |                                          |                                 |             |
| TOTAL |      |            |                                                                  | 11                               | 8                                                               | 7                     | 6                                                         | 5                                  | 4                      | 3                               | 3                                           | 3                                  | 2                                 | 2                                                          | 1                                        | 1                                | 1                                        | 1                               | 1           |

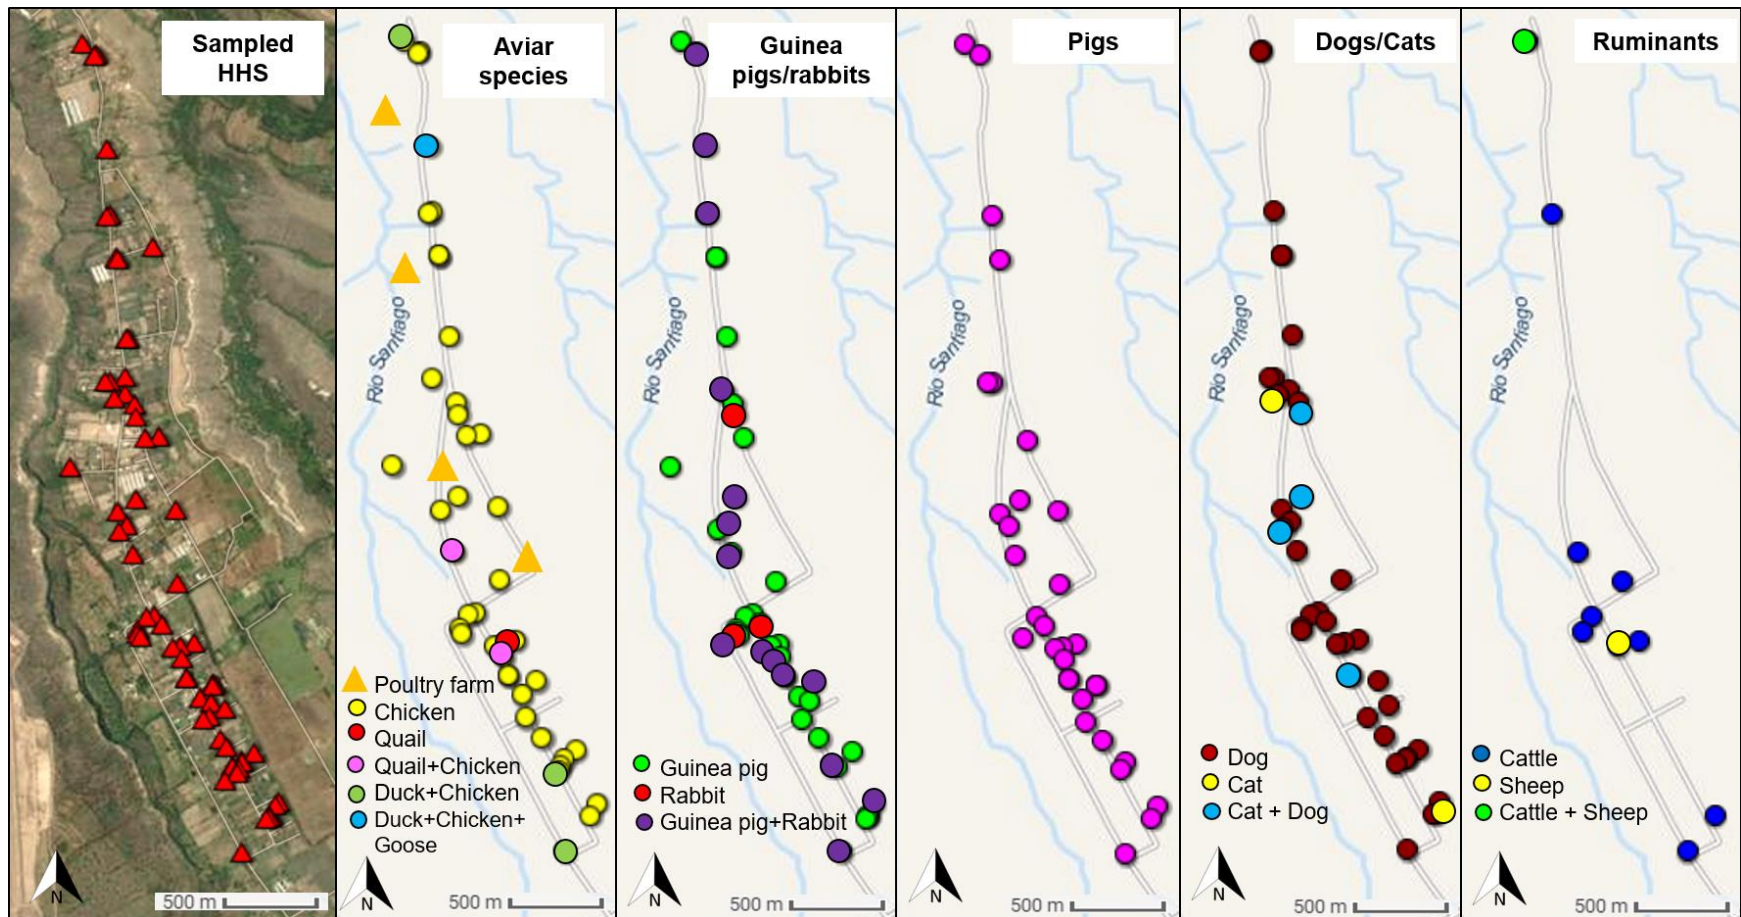

Figure S1. Maps of the community depicting the distribution of animal species.

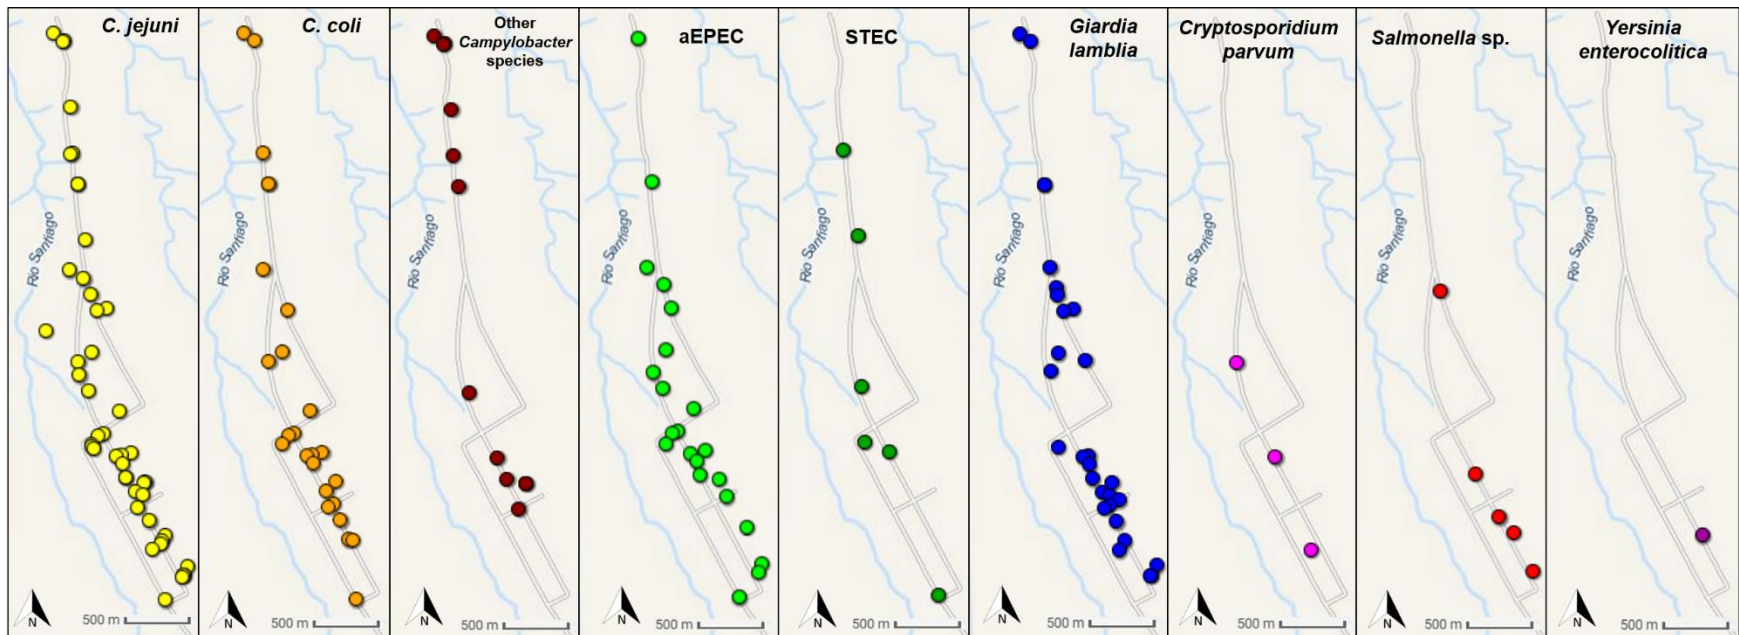

**Figure S2. Maps of the community depicting the distribution of zoonotic enteric pathogens in the households in children and/or animals.**

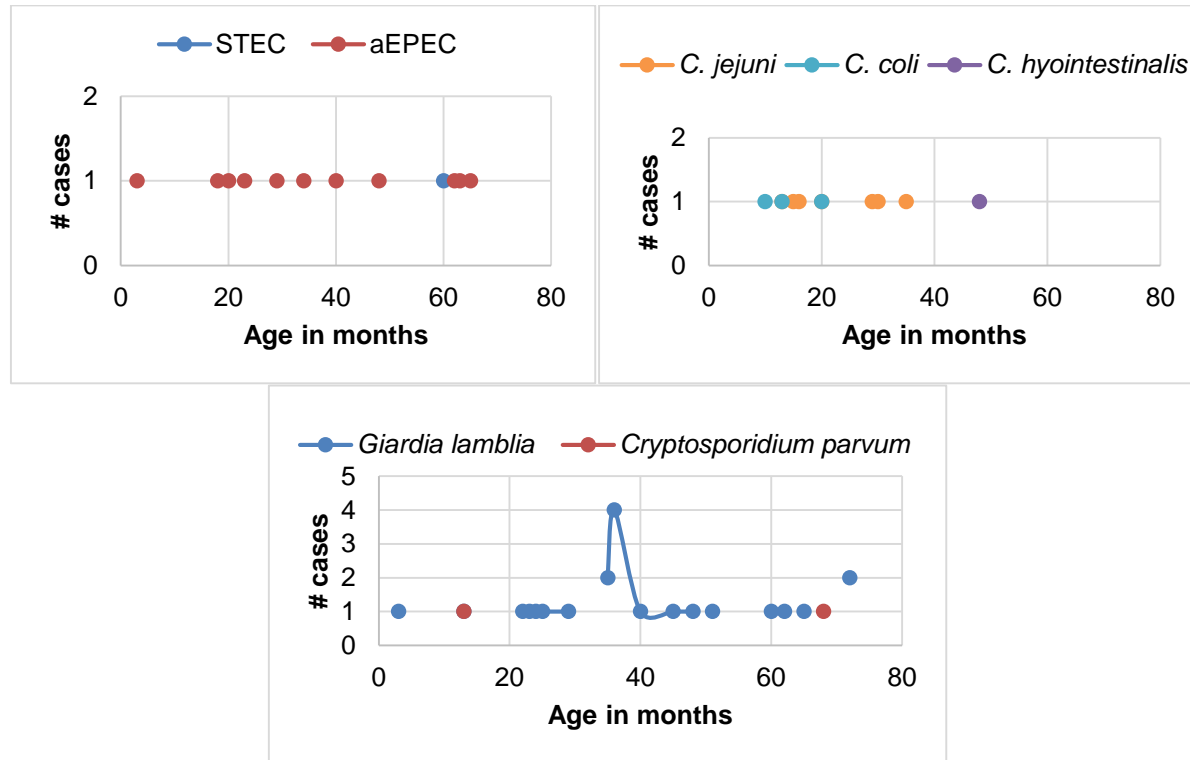

**Figure S3. Cases found in children by age.**
